# Supplementary material for: Fine-mapping and molecular characterisation of primary sclerosing cholangitis genetic risk loci
Source: Springer Nature journal article supplement (doi:10.1038/s41467-024-53602-w), 2024-11-06
Supplement: MOESM1 [file 41467_2024_53602_MOESM1_ESM.pdf]

## **Fine-mapping and molecular characterisation of primary sclerosing cholangitis genetic risk loci**

**Short title:** Genetic characterisation of PSC

**Authors:** Elizabeth C. Goode<sup>1,2,3</sup>, Laura Fachal<sup>1</sup>, Nikolaos Panousis<sup>1</sup>, Loukas Moutsianas<sup>1</sup>, Rebecca E. McIntyre<sup>1</sup>, Benjamin Yu Hang Bai<sup>1,2</sup>, Norihito Kawasaki<sup>4</sup>, Alexandra Wittmann<sup>4</sup>, Tim Raine<sup>2</sup>, Simon M Rushbrook<sup>3,5</sup>, Carl A. Anderson<sup>1\*</sup>.

**Affiliations:** <sup>1</sup>Wellcome Sanger Institute, Hinxton, Cambridge, UK, <sup>2</sup>University of Cambridge, Cambridge, UK, <sup>3</sup>Norfolk and Norwich University Hospital, Norwich, UK, <sup>4</sup>Quadrum Institute, Norwich, UK, <sup>5</sup>Norwich Medical School, University of East Anglia, Norwich, UK.

**Supplementary Information**

Supplementary Tables

**Supplementary Table 1:** Characteristics of the PSC-specific eQTL map study cohort according to disease group.

|                      | PSC-UC (n=42) | UC (n=32)  |
|----------------------|---------------|------------|
| Gender (% Male)      | 81            | 69         |
| Mean Age (Range)     | 50 (17-86)    | 52 (38-75) |
| UDCA use (%)         | 71            | 0          |
| 5-ASA use (%)        | 66            | 90         |
| Azathioprine use (%) | 10            | 21         |

**Supplementary Table 2:** Results of colocalisation between T-cell eQTLs mapped in PSC-UC patients and GWAS risk loci for Ulcerative colitis (UC), Crohn's disease (CD), Rheumatoid arthritis (RhA) and Type 1 Diabetes (T1DM). Beta and two-sided test p-values were estimated through linear regression via QTLtools.

| Chr | GWAS SNP  | Disease | eGene             | Cell type    | PP4  | eQTL Beta | eQTL p-val |
|-----|-----------|---------|-------------------|--------------|------|-----------|------------|
| 1   | rs3180018 | UC      | <i>GBAP1</i>      | T-regulatory | 0.91 | -0.74     | 3.88E-04   |
|     |           |         |                   | T-memory     | 0.98 | -1.01     | 1.30E-10   |
|     |           |         |                   | CD4+CCR9-    | 0.98 | -0.92     | 2.01E-07   |
|     |           |         |                   | CD4+CCR9+    | 0.98 | -0.91     | 7.66E-07   |
|     |           | UC      | <i>THBS3</i>      | CD4+CCR9-    | 0.98 | 0.88      | 5.59E-07   |
| 1   | rs2317230 | RhA     | <i>FCRL3</i>      | CD8+CCR9-    | 0.93 | 0.82      | 3.29E-04   |
| 5   | rs7731626 | RhA     | <i>IL6ST</i>      | T-regulatory | 0.97 | -0.86     | 2.08E-04   |
|     |           |         |                   | T-memory     | 0.90 | -0.81     | 6.16E-04   |
|     |           | RhA     | <i>ANKRD55</i>    | T-memory     | 1.00 | -1.00     | 5.94E-07   |
|     |           |         |                   | CD4+CCR9-    | 1.00 | -0.95     | 9.63E-06   |
|     |           |         |                   | CD4+CCR9+    | 0.86 | -0.86     | 1.20E-03   |
| 7   | rs4728142 | UC      | <i>IRF5</i>       | T-memory     | 0.86 | 0.77      | 4.71E-05   |
| 11  | rs663743  | PSC     | <i>AP003774.1</i> | T-regulatory | 0.99 | 0.98      | 7.27E-06   |
|     |           |         |                   | T-memory     | 0.95 | 1.07      | 1.35E-07   |
|     |           |         |                   | CD4+CCR9-    | 0.95 | 0.96      | 1.83E-05   |
| 11  | rs968567  | RhA     | <i>FADS1</i>      | T-regulatory | 0.89 | 1.51      | 1.38E-07   |
|     |           | RhA     | <i>FADS2</i>      | T-regulatory | 0.98 | 1.60      | 2.01E-09   |
|     |           |         |                   | T-memory     | 1.00 | 1.58      | 2.23E-09   |
|     |           |         |                   | CD4+CCR9-    | 0.99 | 1.58      | 5.40E-09   |
|     |           |         |                   | CD4+CCR9+    | 0.98 | 1.47      | 2.82E-07   |
|     |           |         |                   | CD8+CCR9-    | 0.96 | 1.56      | 9.58E-09   |
|     |           |         |                   | CD8+CCR9+    | 0.95 | 1.46      | 4.22E-07   |
| 12  | rs4760341 | T1DM    | <i>SUOX</i>       | T-regulatory | 0.80 | -0.71     | 1.06E-03   |
| 14  | rs941576  | T1DM    | <i>WARS</i>       | T-regulatory | 0.85 | 1.07      | 3.90E-05   |
|     |           |         |                   | T-memory     | 0.93 | 1.19      | 1.46E-07   |
|     |           |         |                   | CD4+CCR9-    | 0.80 | 1.35      | 2.41E-08   |
|     |           |         |                   | CD8+CCR9-    | 0.97 | -1.03     | 1.37E-05   |
| 19  | rs4802307 | CD      | <i>PPP5C</i>      | T-memory     | 0.85 | -0.92     | 1.63E-06   |
|     |           |         |                   | CD4+CCR9-    | 0.86 | -0.99     | 2.38E-08   |
|     |           |         |                   | CD8+CCR9-    | 0.83 | -0.82     | 1.48E-04   |
| 21  | rs1893592 | PSC     | <i>UBASH3A</i>    | T-memptry    | 0.91 | 0.93      | 4.83E-04   |
| 22  | rs909685  | RhA     | <i>SYNGR1</i>     | CD8+CCR9+    | 0.98 | 1.14      | 7.15E-04   |

UC; Ulcerative colitis, RhA; rheumatoid arthritis, T1DM; Type 1 diabetes mellitus, CD; Crohn's disease, PSC; Primary sclerosing cholangitis.

**Supplementary Figure 1: Enrichment analyses results.**

[illegible]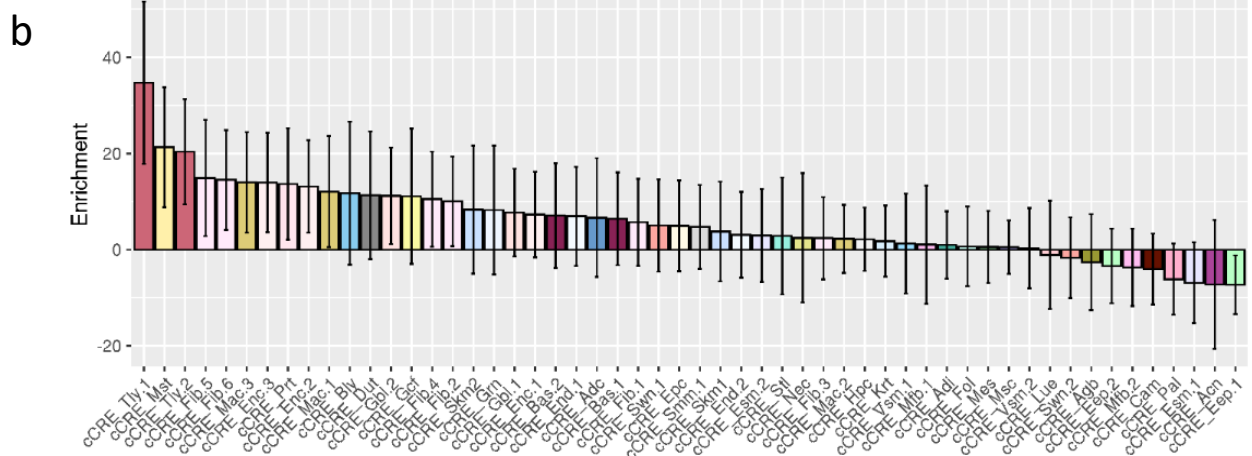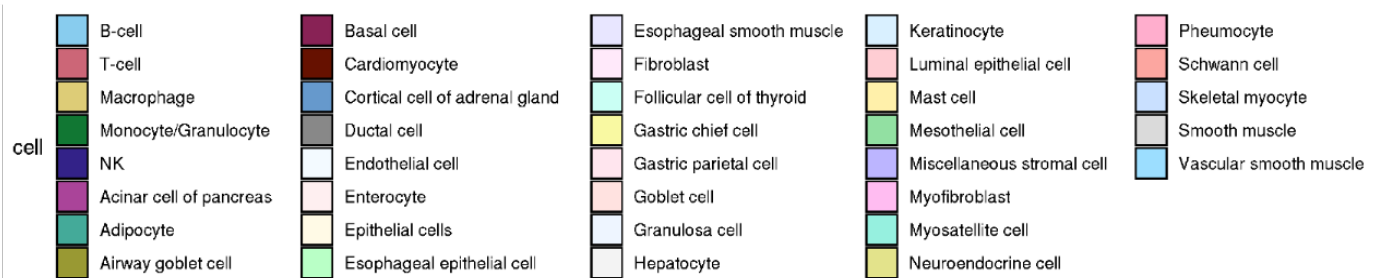

### Supplementary Figure 2: Distance to between eQTL and transcription start site

Distance from transcription start site (TSS) for each significant eQTL (coloured red for those less than 5% FDR) per cell type. Panel a); T-regulatory cells, b); T-memory cells, c); CD4+CCR9- T-cells, d); CD4+CCR9+ T-cells, e); CD8+CCR9- T-cells, f); CD8+CCR9+ T-cells.

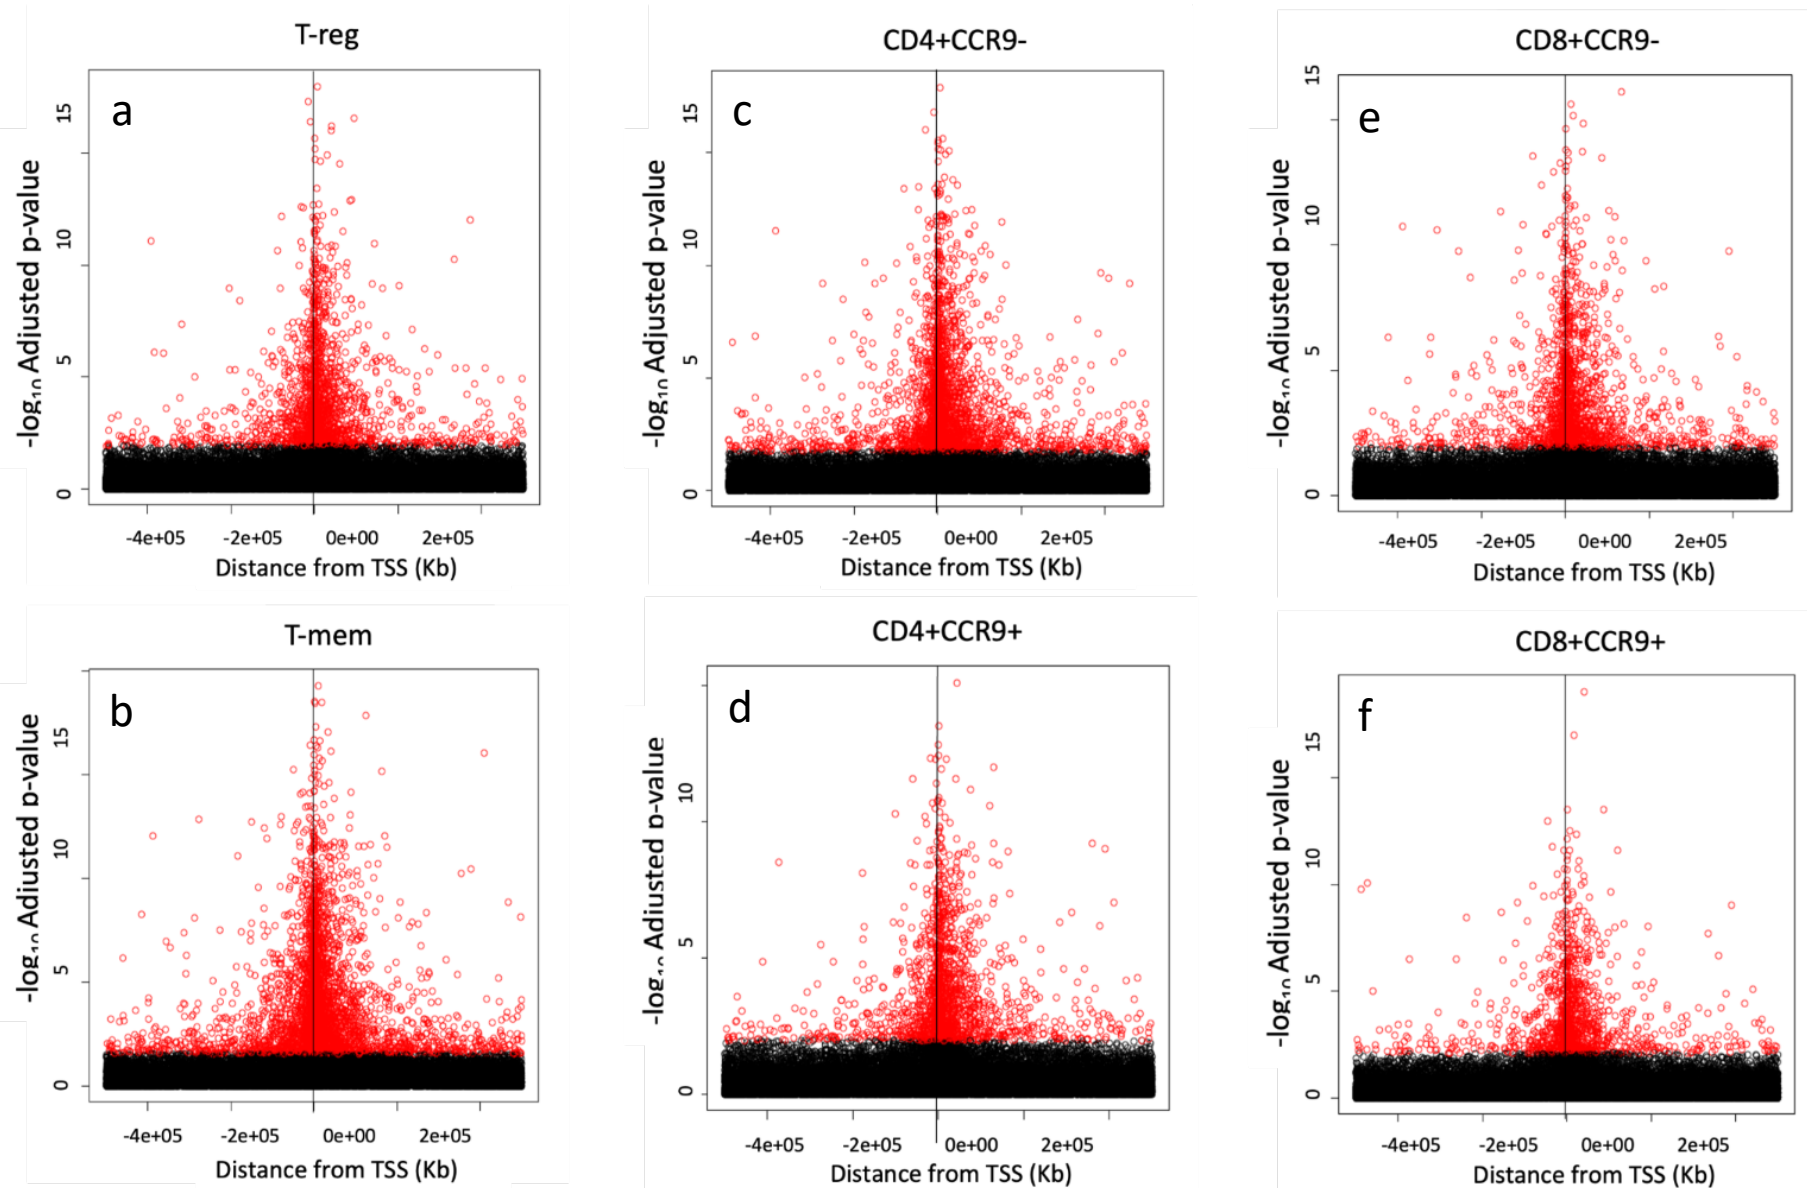

### Supplementary Figure 3: Posterior z-scores of significant eGenes as identified by mashR

Posterior z-scores of significant eGenes as identified by mashR (lfdr < 0.05 in at least one PSC T cell subtype; N = 10,459), grouped by (i) significant eGenes shared across all cell types (panel a), N = 9,176; (ii), significant eGenes in two or more cell types, but not in all cell types (panel b), N = 794; and (iii) those condition specific eGenes, only significant in one cell type (panel c), N = 489).

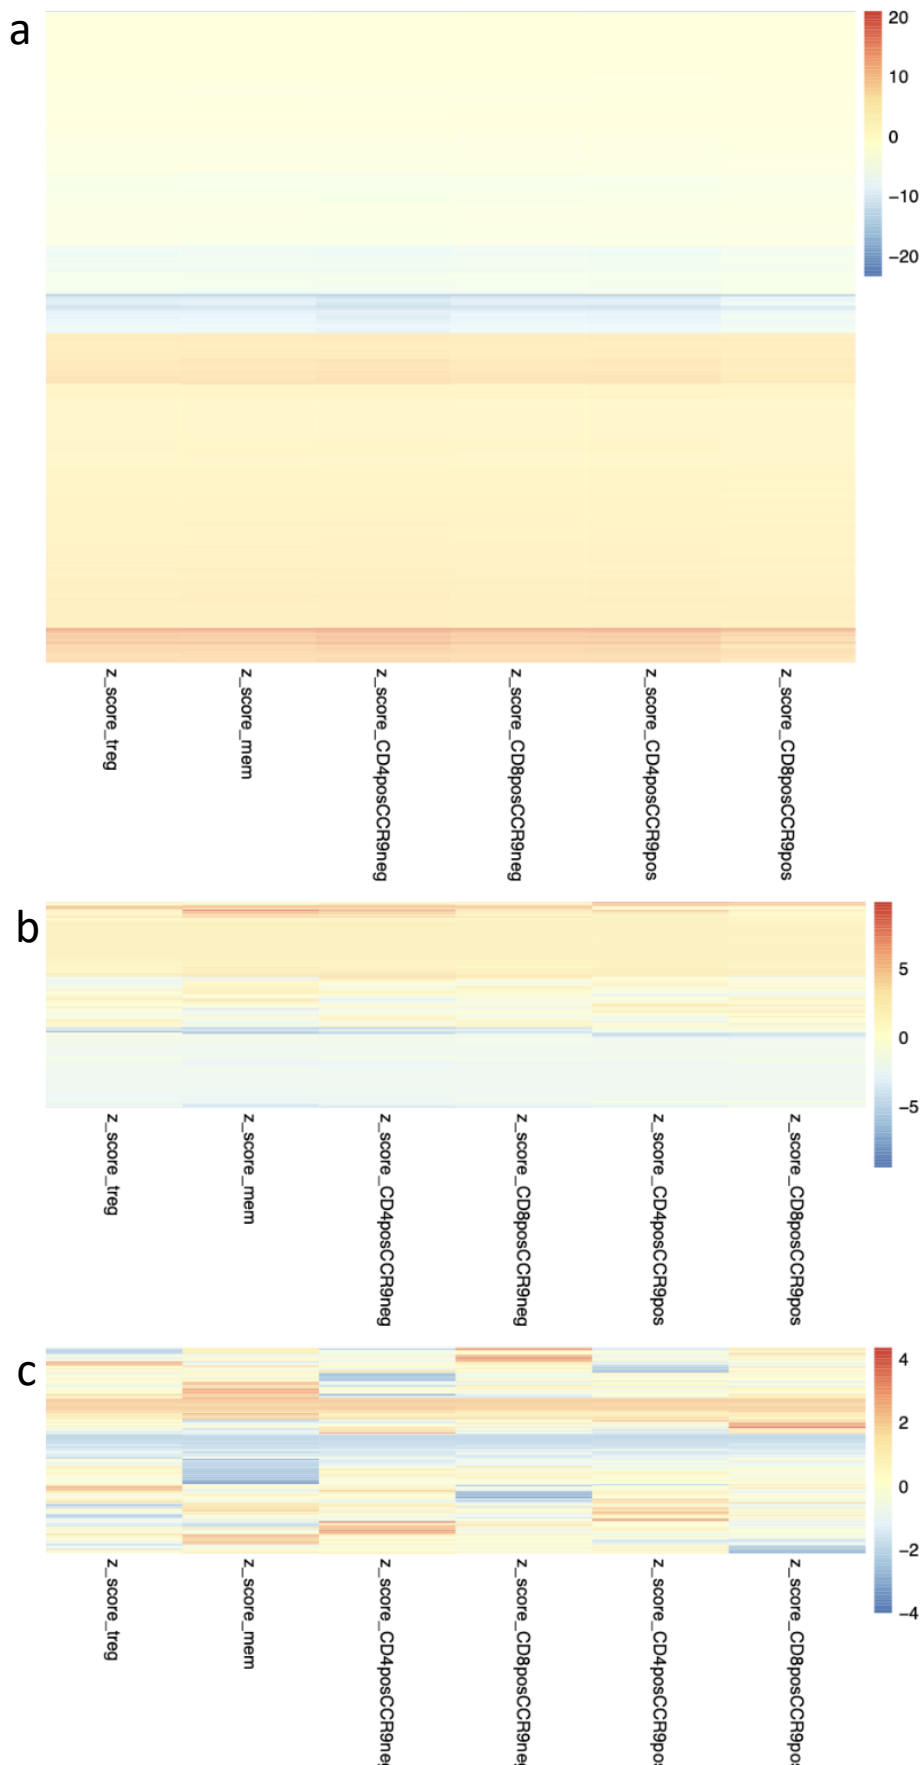

Proportion of significant eGenes in each PSC T cell subtypes (eQTL qvalue < 0.05; estimated from the two-sided p-values derived by QTLtools) replicated in external datasets (pi1)

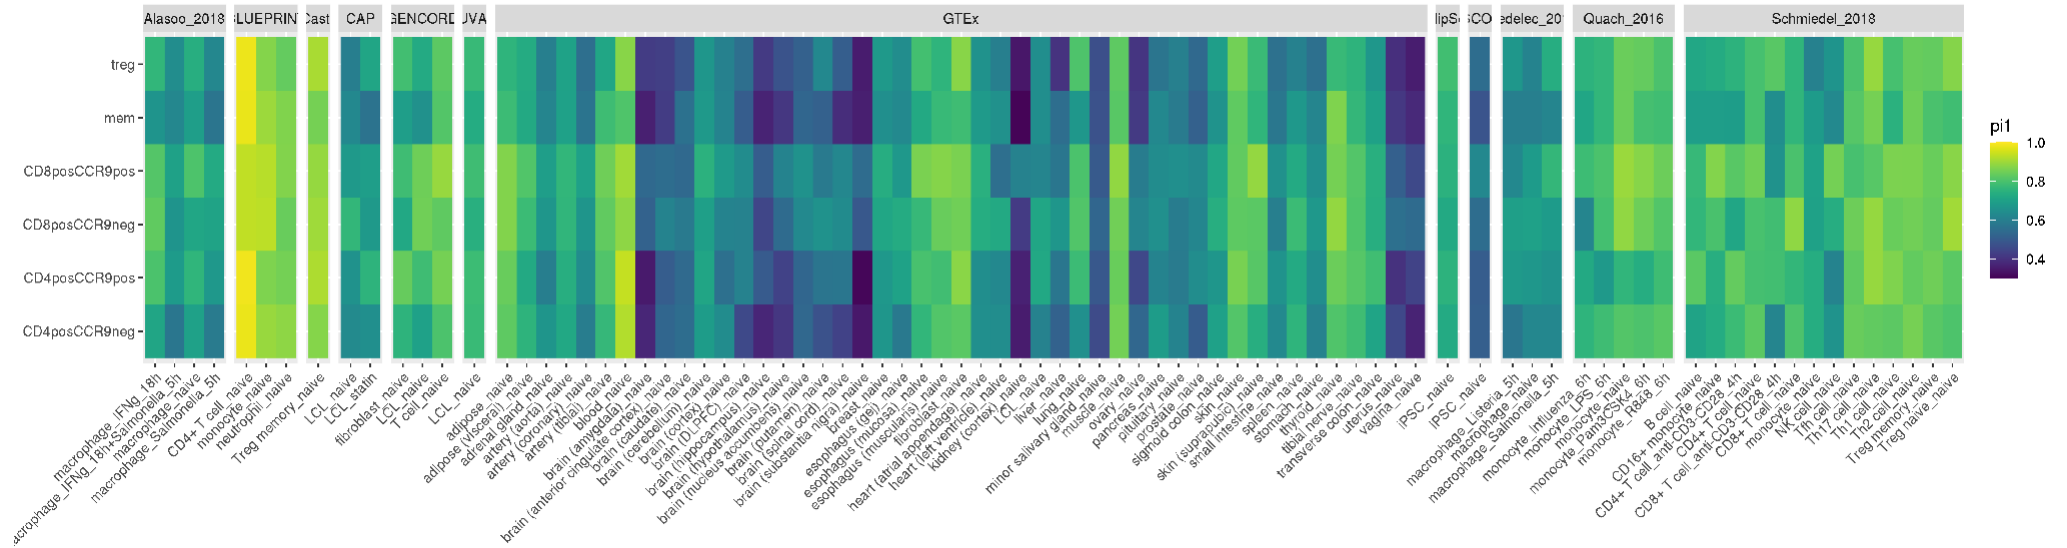

### Supplementary Figure 5: Colocalisation results for *CCDC88B* Chr11 region

*CCDC88B* Chr11: regional association plot for a) PSC GWAS data ( $N_{\text{Cases}} = 4,796$ ;  $N_{\text{Ctr}} = 19,955$ ) and b) colocalising ( $PP4 \geq 0.8$ ) eQTL data for *CCDC88B* in monocytes ( $N = 194$ ). The most-likely causal variant (rs663743  $PP = 0.85$ ) is shown in purple. LD information is calculated from PSC GWAS data<sup>3</sup>

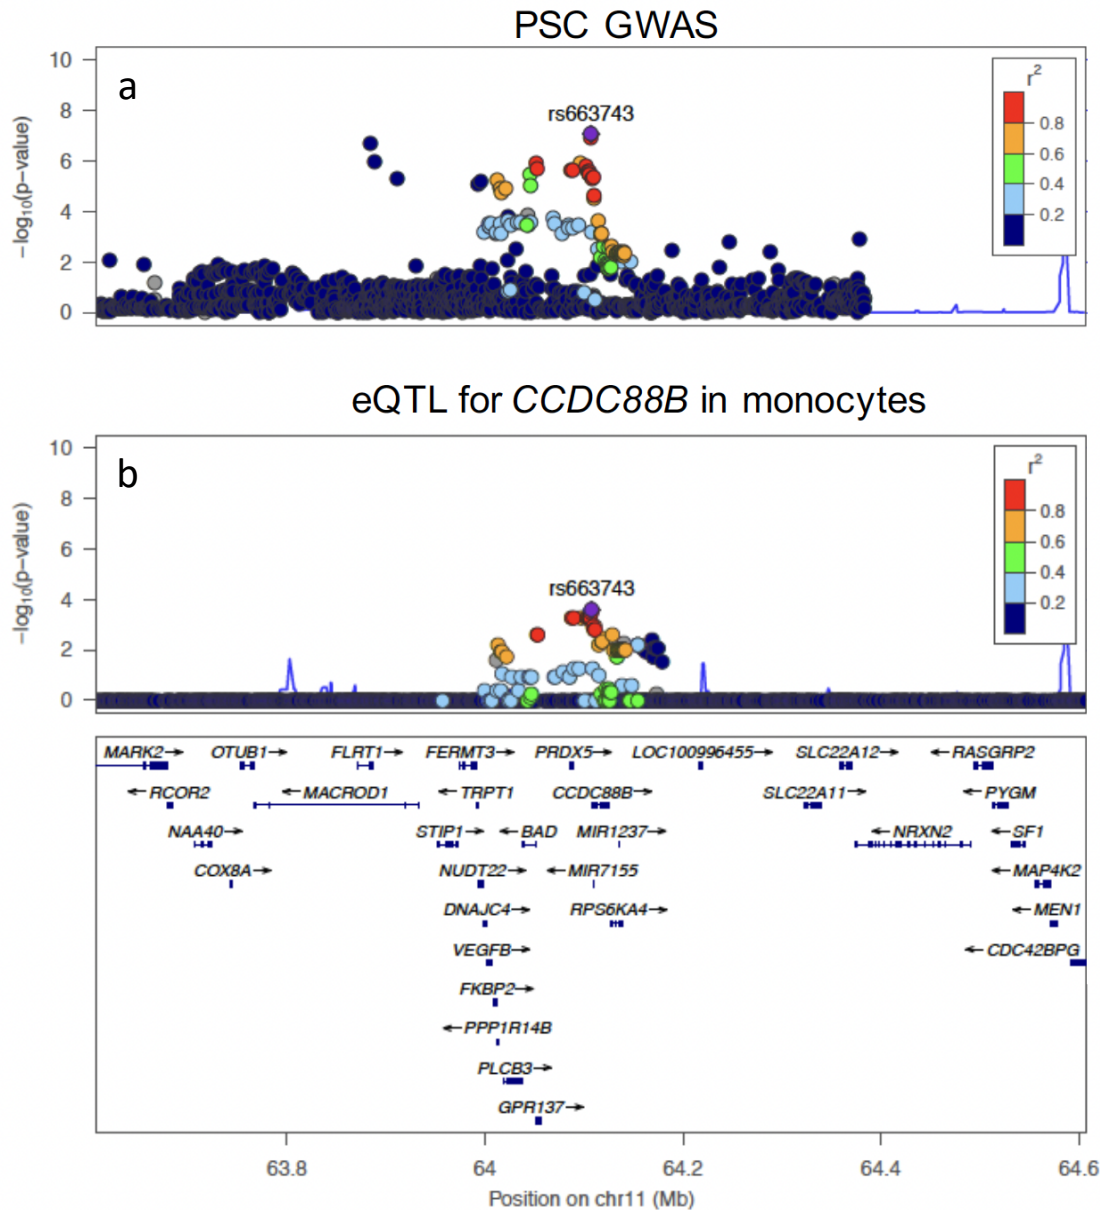



## Supplementary Figure 6: FACS gating strategy for PSC eQTL maps

FACS gating strategy used for PSC specific T-cell separation with sequential sorting from left to right. Panel a); Forward versus side scatter, b); forward scatter height versus width, c); CD3+ versus forward scatter height, d); CD3 versus CD62L, e); CD45RO versus CD3+, f); CD4 versus CD8, g); CCR9 versus CD4.

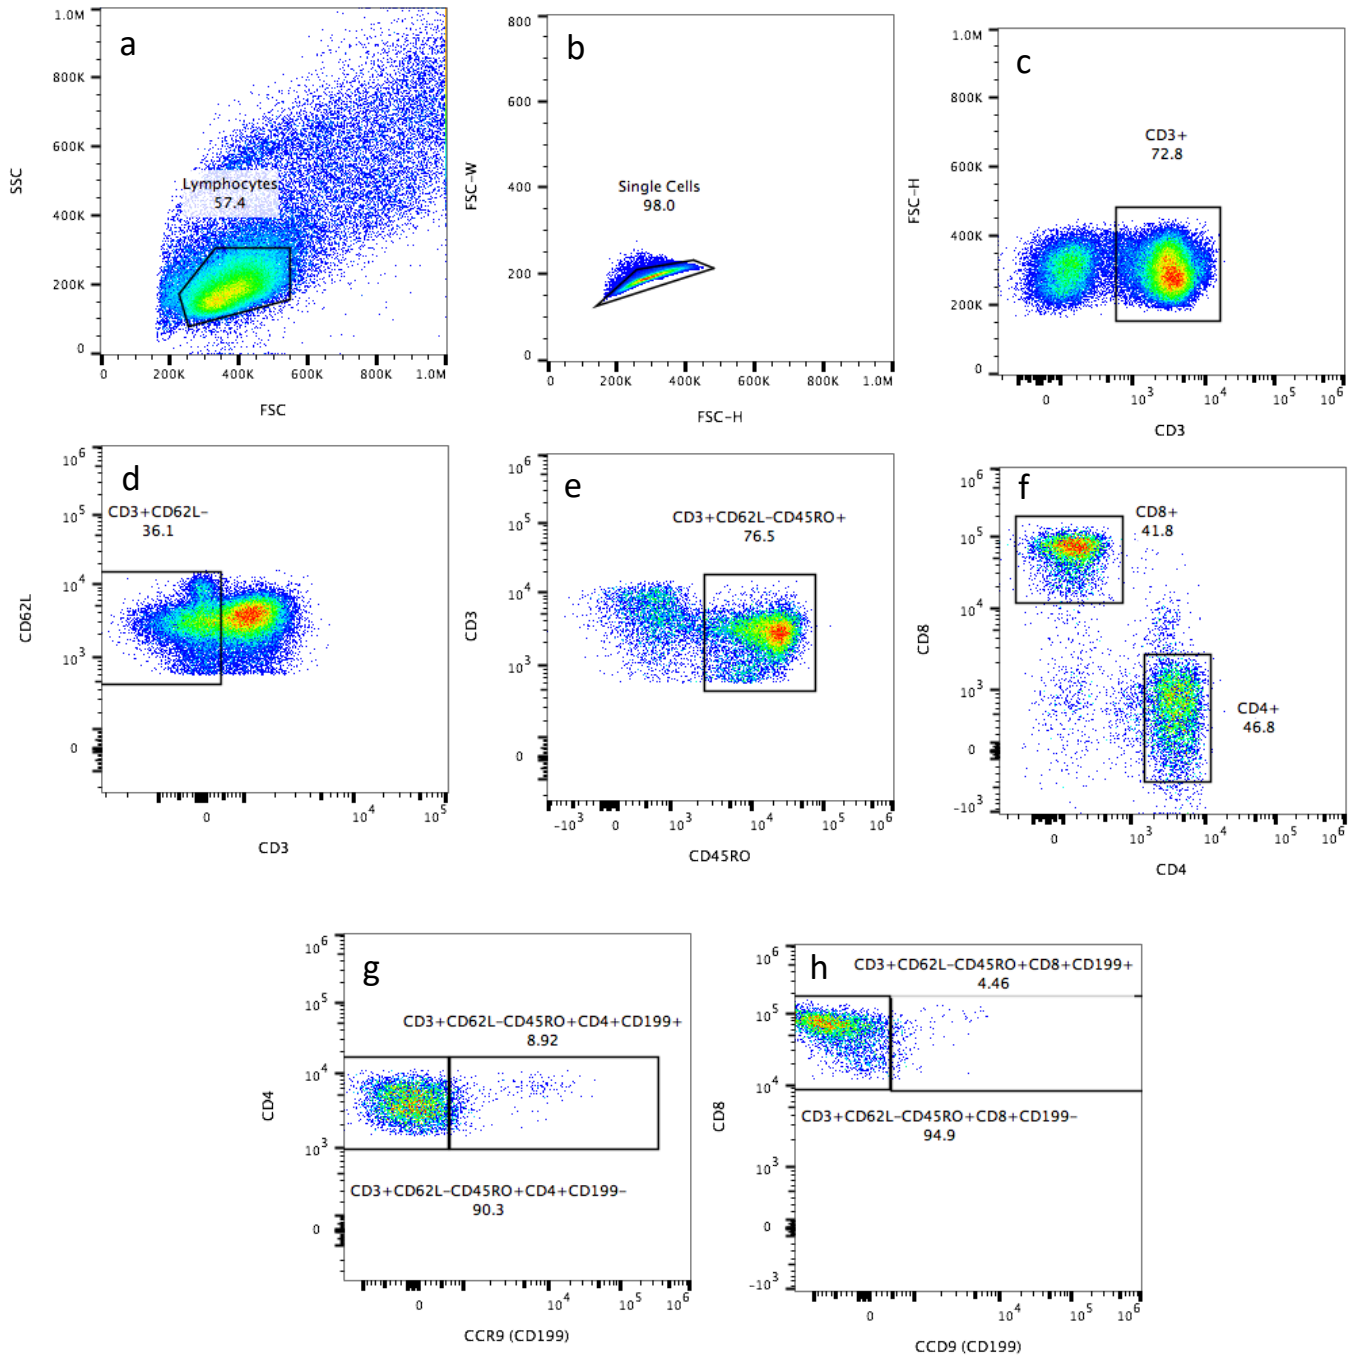

### Supplementary Figure 7: Principal component analysis of study samples compared to 1000 Genomes.

Principal component analysis of study samples compared to 1000 Genomes samples of known ethnicity using a pruned set of 62,805 independent variants with an  $r^2 < 0.2$  and  $MAF > 0.01$ . Panel a) shows PSC samples compared to all ethnicities, and panel b) shows European subpopulations. Three individuals were of Southern European/Iberian ethnicity, highlighted on the Figure. All samples from individuals of Northern and Southern European ethnicity were retained for further analysis.

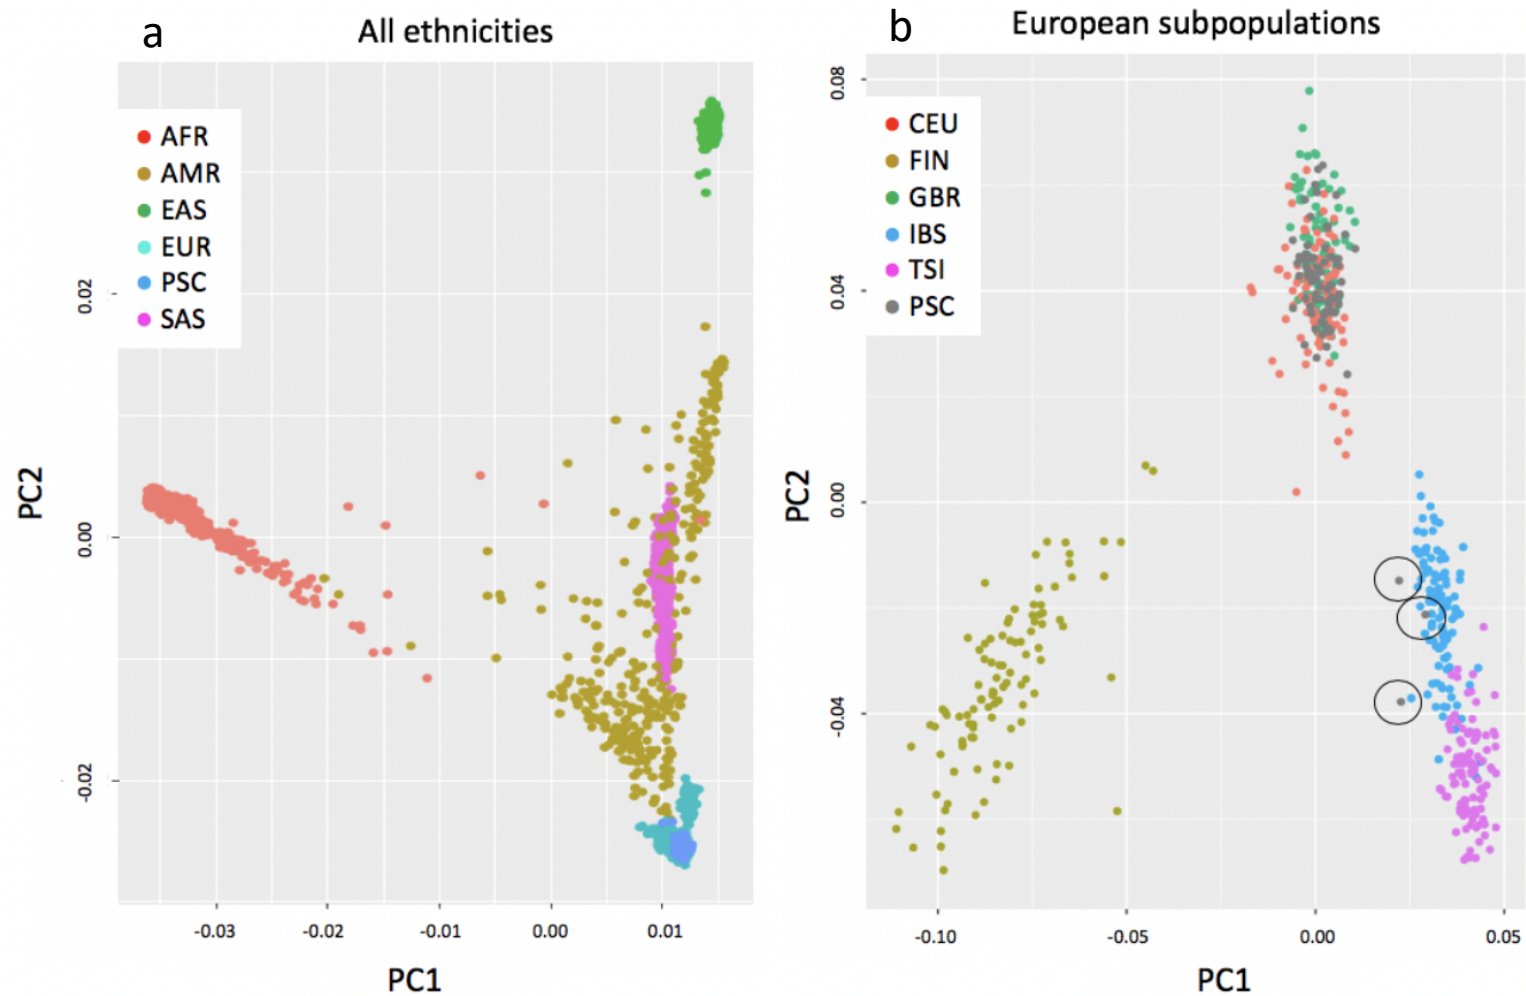

## **Supplementary References**

1. Calderon D, Nguyen MLT, Mezger A, et al. Landscape of stimulation-responsive chromatin across diverse human immune cells. *Nat Genet* 2019;51:1494-1505.
2. Zhang K, Hocker JD, Miller M, et al. A single-cell atlas of chromatin accessibility in the human genome. *Cell* 2021;184:5985-6001 e19.
3. Maurano MT, Humbert R, Rynes E, et al. Systematic localization of common disease-associated variation in regulatory DNA. *Science* 2012;337:1190-5
